# Supplementary material for: Directly written DPP-DTT/SrTiO3organic/inorganic heterojunctions for anisotropic self-powered photodetectors
Source: Royal Society of Chemistry journal article supplement (doi:10.1039/d1tc03719f), 2021-01-01
Supplement: d1tc03719f1.pdf [file d1tc03719f1.pdf]

Electronic Supplementary Information for

## **Direct Writing DPP-DTT/SrTiO<sub>3</sub> Organic/inorganic**

### **Heterojunction for Anisotropic Self-powered Photodetectors**

Yong Zhang,<sup>‡a</sup> Weilin Liu,<sup>‡b</sup> Yushen Liu,<sup>a</sup> Conghuan Wang,<sup>b</sup> Guodong Zhu<sup>\*b</sup> and Weidong Song<sup>\*c</sup>

<sup>a</sup> School of Electronic and Information Engineering, Changshu Institute of Technology, Changshu 215500, China

<sup>b</sup> Department of Materials Science, Fudan University, Shanghai 200433, China

<sup>c</sup> College of Applied Physics and Materials, Wuyi University, 22 Dongcheng Village, Jiangmen, Guangdong, 529020, People's Republic of China

Corresponding Authors:

\**Weidong Song* E-mail: [wdsongwyu@163.com](mailto:wdsongwyu@163.com)

\**Guodong Zhu* E-mail: [gdzhu@fudan.edu.cn](mailto:gdzhu@fudan.edu.cn)

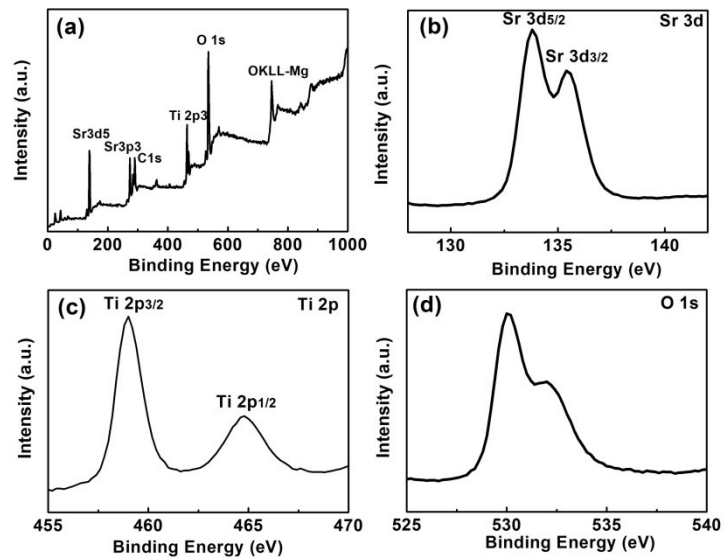

**Figure S1.** XPS spectra: (a) SrTiO<sub>3</sub>; (b) Sr 3d; (c) Ti 2p; (d) O 1s.

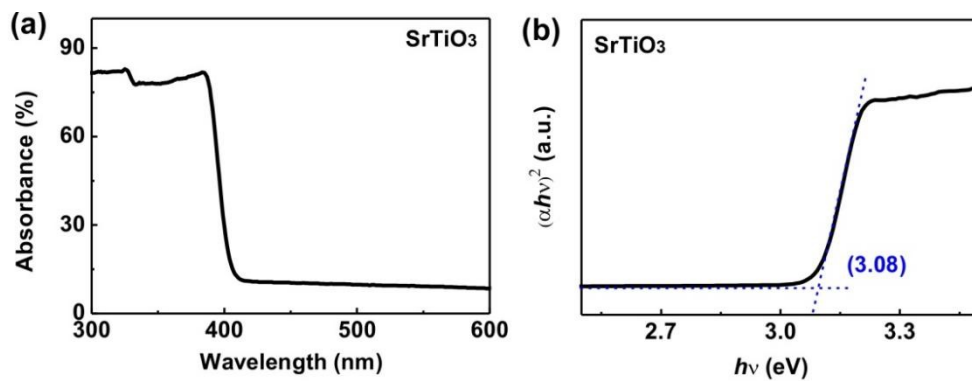

**Figure S2.** (a) UV-vis absorption spectra of the SrTiO<sub>3</sub> film. (b) Tauc plots of SrTiO<sub>3</sub> film obtained from their absorbance spectra.

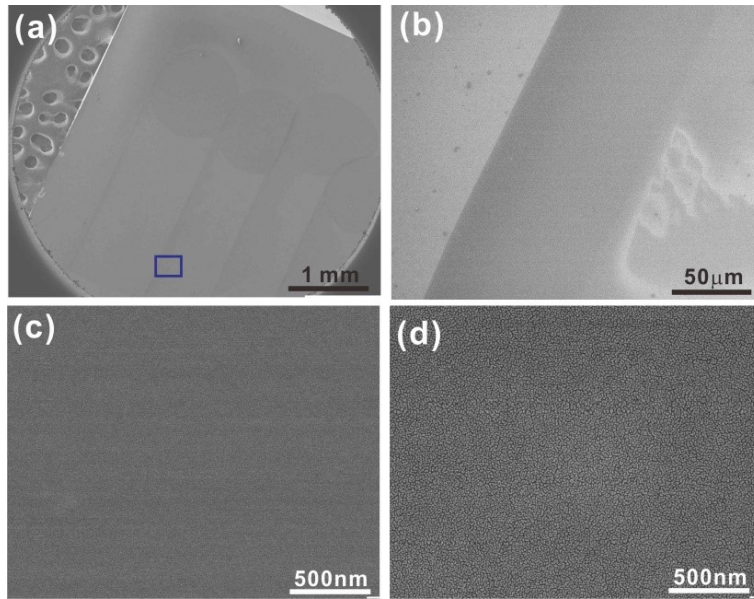

**Figure S3.** (a, b, d) SEM images of the DPP-DTT film with different magnifications via direct writing method. (c) SEM images of the DPP-DTT film via spin coating method.

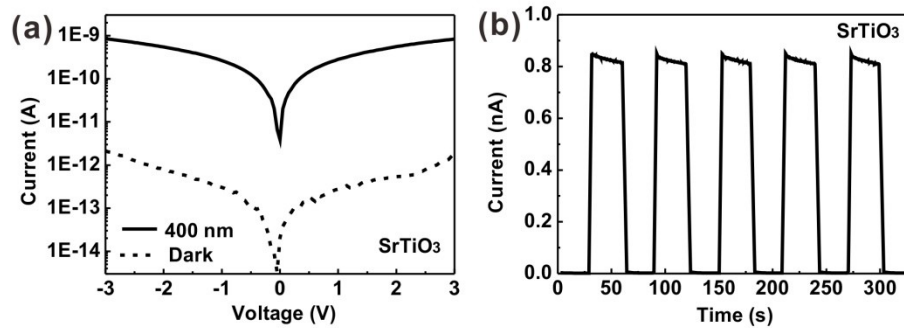

**Figure S4.** (a)  $I$ - $V$  and (b)  $I$ - $t$  curves of the SrTiO<sub>3</sub> PD in dark and upon 400 nm light irradiation.

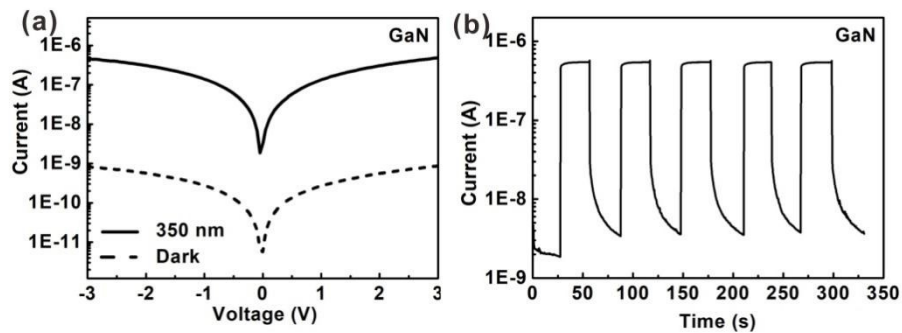

**Figure S5.** (a)  $I$ - $V$  and (b)  $I$ - $t$  curves of the GaN PD in dark and upon 350 nm light irradiation.

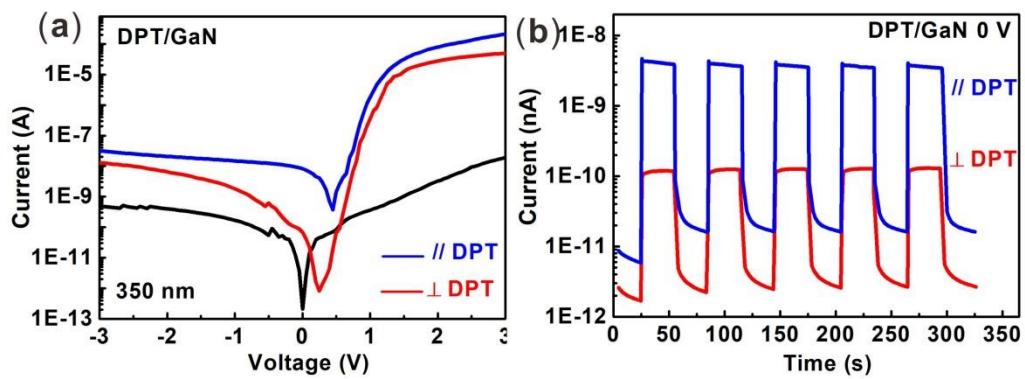

**Figure S6.** Comparison of photoelectric performance between //DPT/GaN and  $\perp$ DPT/GaN PDs.

(a)  $I-V$  and (b)  $I-t$  characteristics under dark and 350 nm light illumination.
